# Supplementary material
Source: PubMed Central journal article supplement (PMC2826791)
Supplement: NIHMS165659-supplement-2.pdf [file NIHMS165659-supplement-2.pdf]

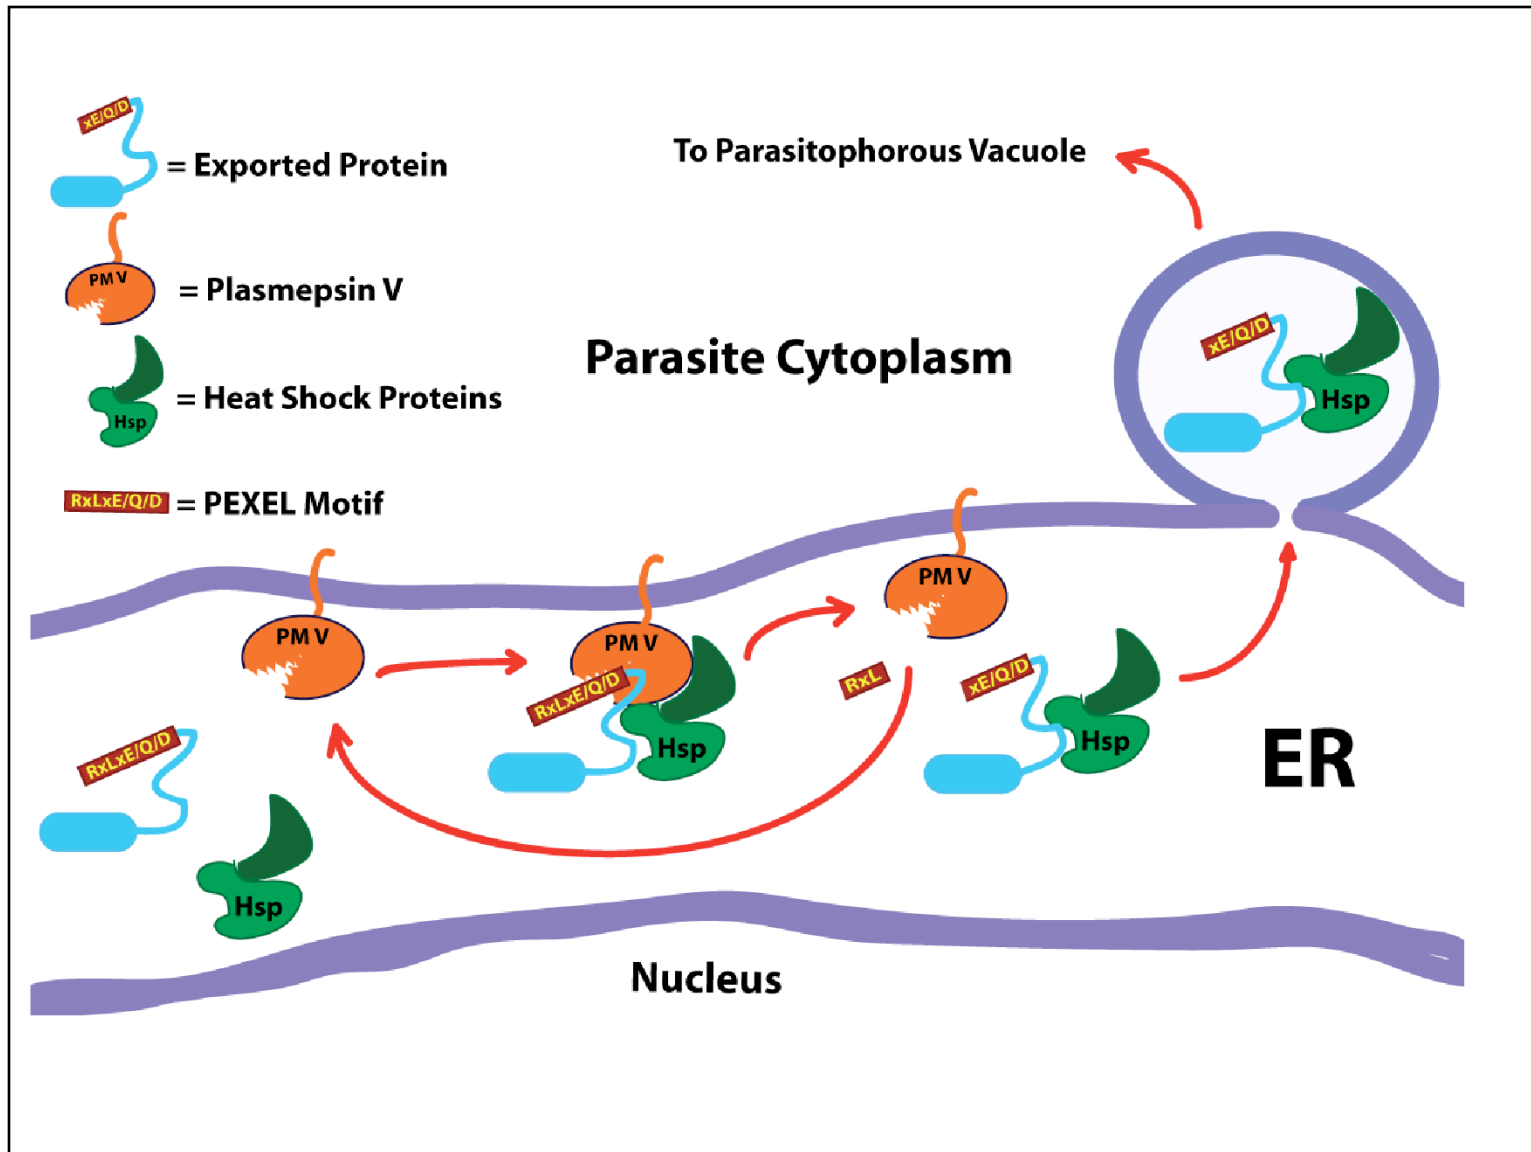

Supplementary Figure 1. Schematic model of exported protein interactions. A PEXEL-containing protein is recognized by PMV in association with chaperones such as HSP 70 and HSP 101. PM V cleaves the PEXEL, releasing mature protein into the stewardship of the chaperones, which usher the protein through the secretory system to the translocon for export into the host erythrocyte.

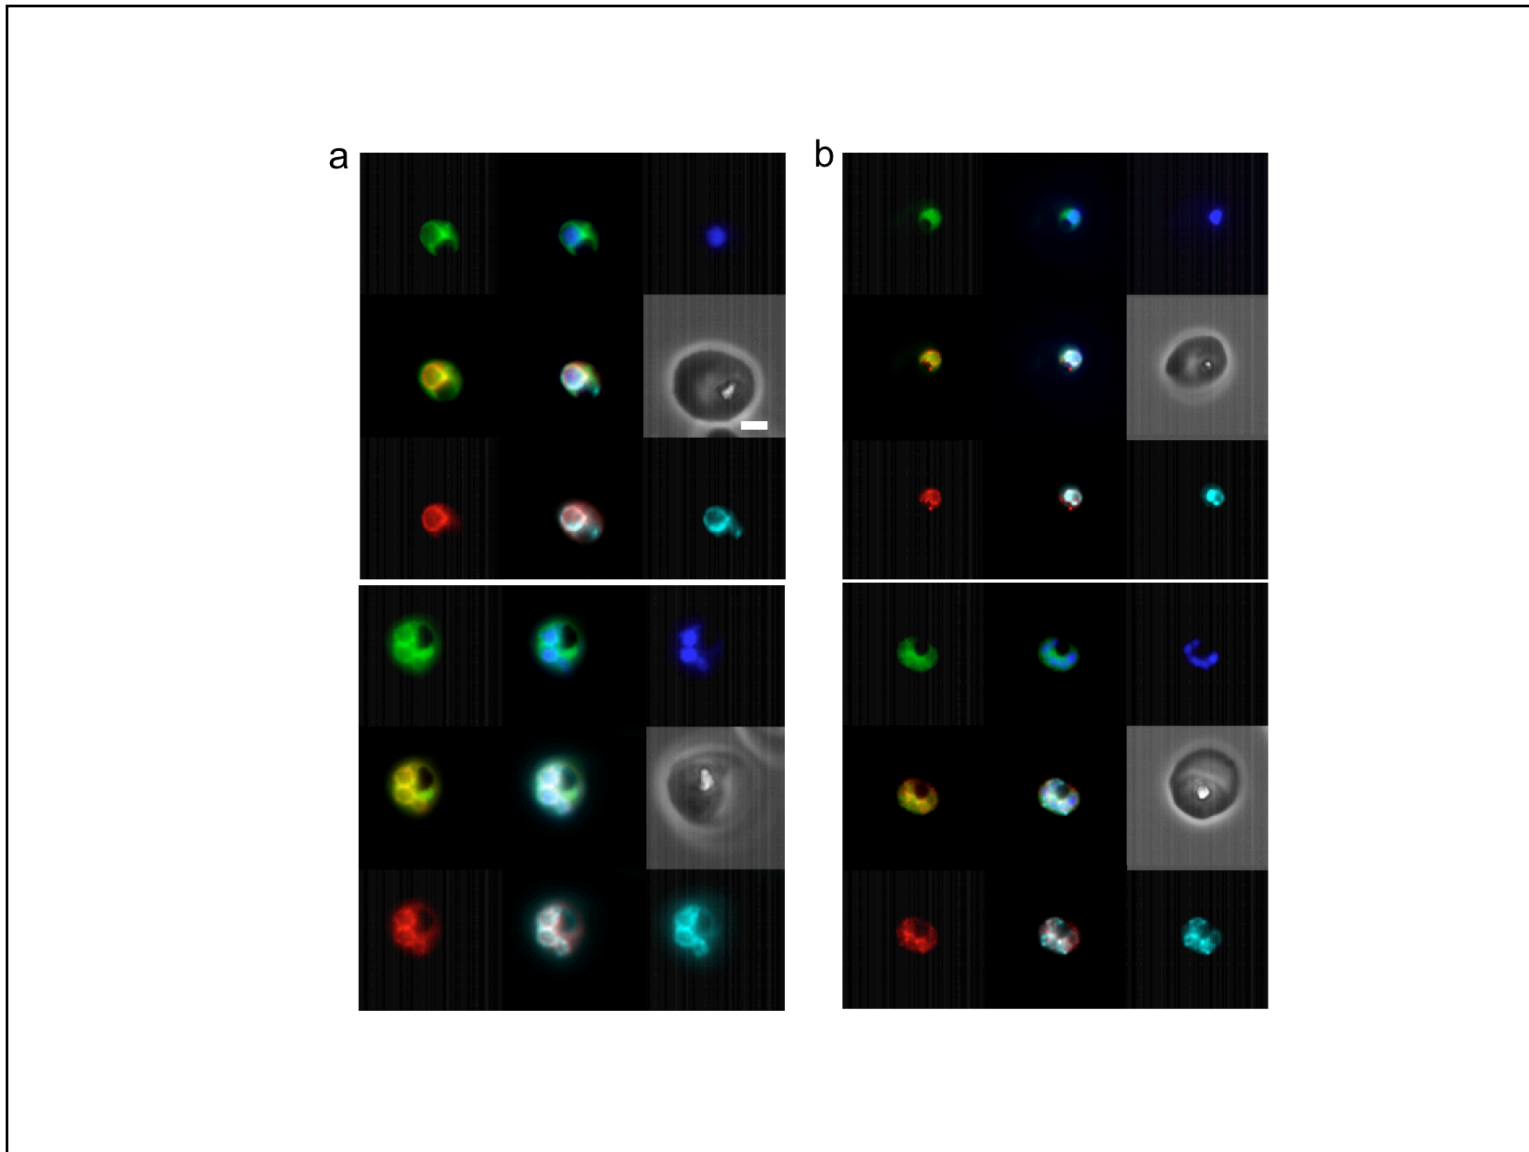

Supplementary Fig 2. Expression of plasmepsin V in C-terminal fusion lines. a) western blot. Parasite extracts were prepared and assayed using anti- PM V antibody as in Fig. 2. BiP served as loading control. 3D7: parental line; DC6: Full-length fusion; EF2: tail deletion. b,c) Live fluorescence of fusion lines from a). DC6 (b) and EF2 (c). Left to right: Phase, GFP signal, Dapi, fluorescence merge and merge. Bar, 2  $\mu\text{m}$ . d,e) immunofluorescence of fusion lines from a). DC6 (d) and EF2 (e) Parasites were fixed and GFP, anti-PM V (red) and anti-BiP (cyan) signals were detected. Nuclei were imaged with DAPI (blue). Merged images are shown between single channel images and in the center. Phase image is on the right. Bar, 2 microns. Overlap between PM V-GFP and BiP was nearly complete except for a few punctae. These likely represent imaging artifacts since they were seen in the red but not the green channel. Alternatively, they could perhaps represent concentration at ER exit sites (Lee et al., Mol. Micro. 68: 1535-46 (2008)).

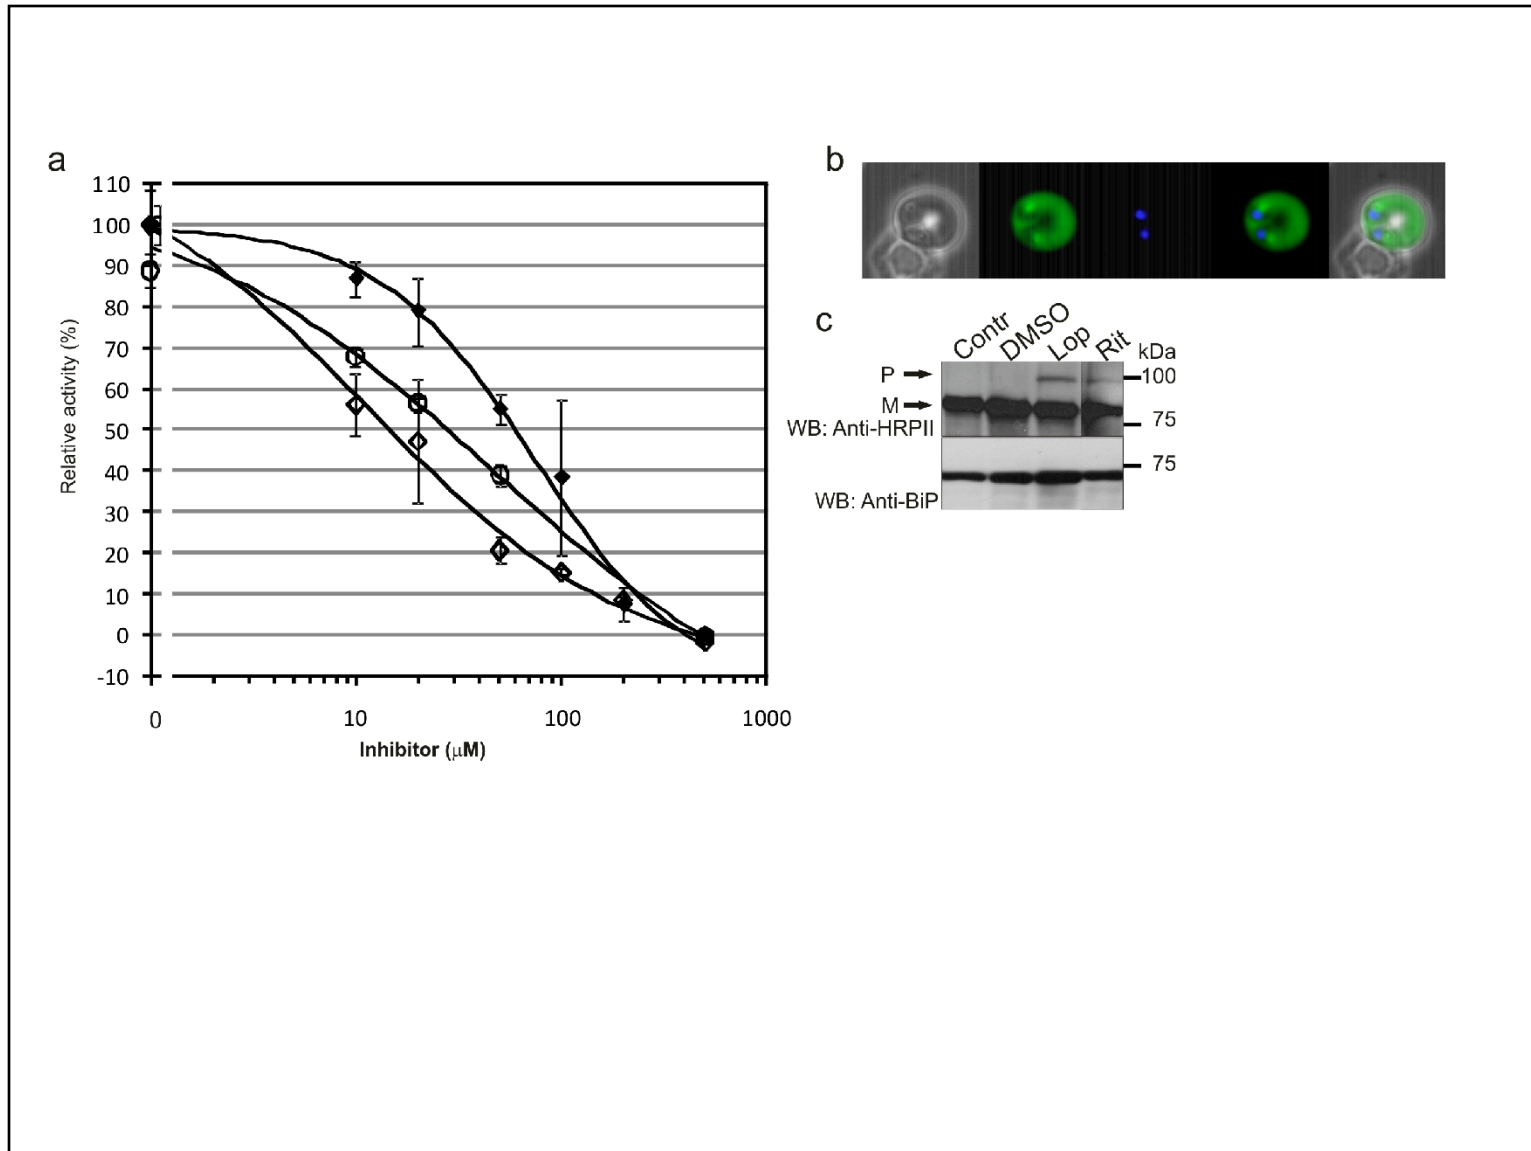

Supplementary Figure 3. Effect of aspartic protease inhibitors on activity and protein export. A) inhibition of *in vitro* activity by lopinavir (solid diamonds), ritonavir (open diamonds) and pepstatin (open circles). Error bars indicate the range of triplicate determinations. B) Live fluorescence of histidine-rich protein II (HRP11)-GFP fusion integrant parasites. Mid-trophozoites are shown. Left to right: phase, GFP, DAPI, merges. C) *in vivo* effect on exported protein processing. HRP11-GFP fusion integrant parasites were incubated for 6 h with 50 μM lopinavir, ritonavir or solvent alone, parasite pellets collected and analyzed by western blot using anti-GFP Ab. BiP served as a loading control. Arrows indicate precursor (P) and mature (M) HRP11-GFP. Protease inhibitors: Lopinavir from Kaletra®; Ritonavir from Norvir®; Pepstatin: microbial source from Sigma. The BACE inhibitors BF72 and RP57 (S. Romeo, Milan), BACE inhibitor 1 (Calbiochem) and GRL-8234 (J. Tang, Oklahoma Medical Research Foundation) were all non-inhibitory at high concentrations.

| Band #   | Mol. Wt. Marker (kDa) | PlasmoDB ID | Description of Protein                  | PEX= PEXEL Motif or SP= Signal Peptide | # of Peptides found with PMV-wt ( $\alpha$ GFP) | # of Peptides found with PMV-mut ( $\alpha$ GFP) | # of Peptides found with PMV-wt ( $\alpha$ PMV) | Mol. Wt. of Protein, kDa |
|----------|-----------------------|-------------|-----------------------------------------|----------------------------------------|-------------------------------------------------|--------------------------------------------------|-------------------------------------------------|--------------------------|
| <b>1</b> | <b>250</b>            | PFI1475w    | MSP1 Precursor                          | <b>SP</b>                              | 0                                               | 3                                                | 2                                               | 196.7                    |
|          |                       | PFE0040c    | PfEMP2 or MESA                          | <b>PEX</b>                             | 0                                               | 0                                                | 3                                               | 168.1                    |
| <b>2</b> | <b>150</b>            | PF14_0316   | DNA topoisomerase II, putative          | -                                      | 0                                               | 3                                                | 0                                               | 169.9                    |
|          |                       | PFI1445w    | High molecular weight rhoptry protein-2 | <b>SP</b>                              | 6                                               | 22                                               | 13                                              | 162.5                    |
| <b>3</b> | <b>100</b>            | PF14_0201   | Surface Protein, Pf113                  | <b>SP</b>                              | 0                                               | 0                                                | 3                                               | 112.5                    |
|          |                       | PFI0265c    | RhopH3                                  | <b>SP</b>                              | 1                                               | 2                                                | 3                                               | 105.5                    |
|          |                       | PF11_0175   | Heat Shock Protein 101                  | <b>SP</b>                              | 3                                               | 4                                                | 5                                               | 103                      |
|          |                       | PF13_0133   | Plasmepsin 5-GFP                        | <b>SP</b>                              | 11                                              | 7                                                | 0                                               | 96.7                     |
|          |                       | PFL1070c    | endoplasmic homolog precursor, putative | <b>SP</b>                              | 6                                               | 0                                                | 0                                               | 95.3                     |
|          |                       | PF13_0233   | myosin A                                | -                                      | 0                                               | 4                                                | 0                                               | 93                       |

|          |           |            |                                        |            |   |   |    |      |
|----------|-----------|------------|----------------------------------------|------------|---|---|----|------|
|          |           | PF07_0029  | heat shock protein 86, putative        | -          | 3 | 4 | 0  | 86.7 |
| <b>4</b> | <b>75</b> | PF14_0102  | rhoptry-associated protein 1           | <b>SP</b>  | 0 | 8 | 2  | 90.4 |
|          |           | PFL1545c   | chaperonin, cpn60                      | <b>SP</b>  | 0 | 2 | 5  | 81.7 |
|          |           | PF08_0032  | DNAJ protein                           | -          | 0 | 3 | 0  | 77   |
|          |           | PF08_0054  | Heat shock protein 70                  | -          | 2 | 6 | 14 | 74.3 |
|          |           | MAL7P1.228 | Heat Shock 70 KDa Protein              | -          | 0 | 4 | 7  | 73.3 |
|          |           | PFI0875w   | Heat shock protein 70                  | <b>SP</b>  | 4 | 5 | 5  | 72.4 |
|          |           | PF13_0133  | Plasmepsin 5                           | <b>SP</b>  | 3 | 0 | 0  | 69.4 |
| <b>5</b> | <b>50</b> | MAL8P1.17  | Protein disulfide isomerase            | <b>SP</b>  | 0 | 0 | 3  | 55.5 |
|          |           | PF13_0062  | Putative Clathrin-adaptor medium chain | -          | 0 | 0 | 4  | 50.7 |
|          |           | PFD0090c   | Plasmodium exported protein (PHISTa)   | <b>PEX</b> | 0 | 1 | 2  | 50.1 |
|          |           | PF13_0143  | phosphoribosylpyrophosphate            | -          | 3 | 2 | 3  | 49.8 |

|  |  |             |                                          |            |   |   |   |      |
|--|--|-------------|------------------------------------------|------------|---|---|---|------|
|  |  |             | synthetase                               |            |   |   |   |      |
|  |  | PF13_0304   | elongation factor-1 alpha                | -          | 2 | 3 | 4 | 49.1 |
|  |  | PFE0060w    | PIESP2 erythrocyte surface protein       | <b>PEX</b> | 0 | 3 | 5 | 48.7 |
|  |  | PFE0075c    | rhoptry-associated protein 3             | <b>SP</b>  | 0 | 5 | 0 | 47.2 |
|  |  | PFE0080c    | rhoptry-associated protein 2             | <b>SP</b>  | 0 | 7 | 1 | 46.9 |
|  |  | PFI1780w    | Plasmodium exported protein PHISTc       | <b>PEX</b> | 0 | 0 | 8 | 45.4 |
|  |  | PFI0880c    | glideosome-associated protein 50         | <b>SP</b>  | 3 | 5 | 0 | 44.8 |
|  |  | MAL13P1.237 | conserved Plasmodium protein             | -          | 2 | 3 | 3 | 42.4 |
|  |  | PFL2215w    | Actin I                                  | -          | 3 | 0 | 3 | 41.9 |
|  |  | MAL7P1.174  | Plasmodium exported protein PHISTb       | <b>PEX</b> | 0 | 0 | 6 | 37.7 |
|  |  | PF14_0598   | glyceraldehyde-3-phosphate dehydrogenase | -          | 2 | 0 | 3 | 37   |

|  |  |             |                                                      |   |   |   |   |      |
|--|--|-------------|------------------------------------------------------|---|---|---|---|------|
|  |  | PFE0065w    | skeleton-binding protein 1                           | - | 1 | 2 | 6 | 36.4 |
|  |  | PF11_0313   | 60S Ribosomal protein P0                             | - | 0 | 0 | 5 | 34.9 |
|  |  | PF10_0068   | RNA binding protein                                  | - | 0 | 0 | 3 | 29.5 |
|  |  | MAL13P1.413 | Membrane Associated Histidine Rich Protein (MAHRP-1) | - | 0 | 0 | 4 | 28.9 |

Supplementary Table 1. Proteins identified from the pulldowns in Supplementary Fig. 6. Included are all proteins for which two or more peptides were identified in one of the samples ( $p < .05$ ).
